# Supplementary material for: A proton transfer mechanism along the PO4 anion chain in the [Zn(HPO4)(H2PO4)]2− coordination polymer
Source: Royal Society of Chemistry journal article supplement (doi:10.1039/c9cp04216d), 2019-01-01
Supplement: c9cp04216d1.pdf [file c9cp04216d1.pdf]

## Proton Transfer Mechanism along the PO<sub>4</sub> Anion Chain in the [Zn(HPO<sub>4</sub>)(H<sub>2</sub>PO<sub>4</sub>)]<sup>2-</sup> Coordination Polymer

Hieu C. Dong,<sup>a</sup> Hieu T. Hoang,<sup>a</sup> Tran M. Dinh,<sup>b</sup> Thang B. Phan,<sup>a</sup> Sareeya Bureekaew,<sup>c</sup> Yoshiyuki Kawazoe<sup>d</sup> and  
Hung M. Le<sup>a,\*</sup>

<sup>a</sup>Center for Innovative Materials and Architectures (INOMAR), Vietnam National University, Ho Chi Minh City 721337,  
Vietnam.

<sup>b</sup>Institute of Research and Development, Duy Tan University, Da Nang 550000, Vietnam.

<sup>c</sup>Department of Chemical and Biomolecular Engineering, School of Energy Science and Engineering, Vidyasirimedhi  
Insti-tute of Science and Technology, Rayong 21210, Thailand.

<sup>d</sup>New Industry Creation Hatchery Center, Tohoku University, Sendai 980-8579, Japan.

\*Corresponding Author: Hung M. Le, email: [hung.m.le@hotmail.com](mailto:hung.m.le@hotmail.com)

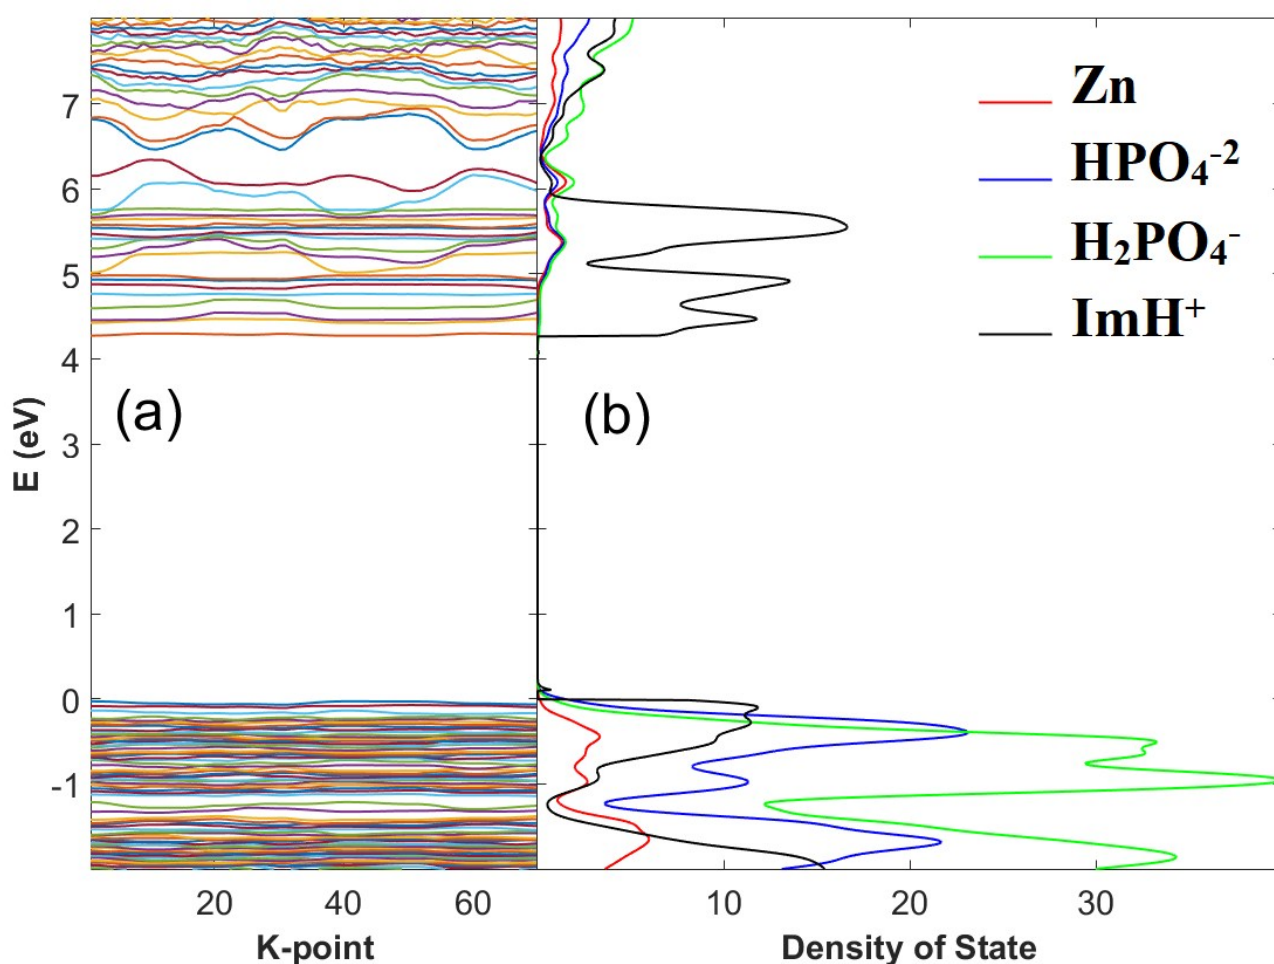

**Figure s1:** (a) Band structure of Zn coordination polymers (CPs), (b) PDOS of Zn<sup>2+</sup>, HPO<sub>4</sub><sup>2-</sup>, H<sub>2</sub>PO<sub>4</sub><sup>-</sup>, and ImH<sup>+</sup> given by PBE calculations

Position of atoms in initial structure for M<sup>(1)</sup> case:

|    |             |             |            |
|----|-------------|-------------|------------|
| Zn | 16.27948000 | 7.04311800  | 5.08939900 |
| Zn | 25.35612700 | 7.04309700  | 5.08939900 |
| Zn | 20.66713400 | 3.48896900  | 5.10362600 |
| P  | 22.23775200 | 6.12046700  | 5.68317900 |
| P  | 23.73219600 | 9.11868200  | 3.63849700 |
| P  | 18.58441700 | 8.17278600  | 6.73955000 |
| P  | 17.68282000 | 4.23333500  | 4.41870600 |
| O  | 22.24850200 | 4.79566800  | 4.86906600 |
| O  | 17.08590900 | 7.87907600  | 6.66200900 |
| O  | 26.39583800 | 6.87162800  | 6.80595600 |
| O  | 21.45592000 | 5.78282600  | 7.01937300 |
| O  | 19.50009200 | 7.25440000  | 7.46499800 |
| O  | 23.68175400 | 6.55053300  | 6.01576400 |
| O  | 14.75139200 | 5.80628500  | 5.58858100 |
| O  | 21.51834400 | 7.27261500  | 4.94327000 |
| O  | 18.73250200 | 9.64728200  | 7.33001100 |
| O  | 19.03947300 | 8.28518300  | 5.18738800 |
| O  | 23.84891200 | 10.34766100 | 2.67688100 |
| O  | 25.13026500 | 8.65405200  | 4.02147700 |
| O  | 16.73540700 | 8.52616800  | 3.73544100 |
| O  | 22.87810000 | 9.56629300  | 4.86469100 |
| O  | 22.93237100 | 8.00784600  | 2.88366300 |
| O  | 17.24040400 | 5.65935300  | 4.10358800 |
| O  | 24.99561200 | 5.33930200  | 3.97129600 |
| O  | 21.12765700 | 3.11311900  | 7.07445000 |
| O  | 16.35167800 | 3.67284400  | 5.23471000 |
| O  | 18.86616300 | 4.19899000  | 5.40373200 |
| O  | 17.92017900 | 3.30141200  | 3.25146400 |
| O  | 20.16039700 | 2.31674800  | 3.58505300 |
| H  | 20.65797000 | 6.39221900  | 7.25507700 |
| H  | 17.91093600 | 10.14322100 | 7.39564100 |
| H  | 19.90434900 | 7.84991800  | 4.99815200 |
| H  | 22.24210400 | 8.88531300  | 5.19641400 |
| H  | 22.21307600 | 7.58560500  | 3.43325300 |
| H  | 16.23520500 | 2.72037000  | 5.16656100 |
| H  | 17.66737600 | 8.70511000  | 3.97462800 |
| H  | 16.69835100 | 8.29962300  | 2.80106400 |
| H  | 20.63340300 | 1.84534500  | 2.89958900 |
| H  | 19.19487900 | 2.62325200  | 3.29382400 |
| H  | 21.33210100 | 4.01550600  | 7.40082800 |
| H  | 20.44346600 | 2.73515200  | 7.63485400 |
| H  | 25.80202500 | 6.62363900  | 7.52652000 |
| H  | 27.25541500 | 7.13670200  | 7.14299500 |
| H  | 25.22558000 | 5.09634300  | 3.07120500 |
| H  | 24.12626400 | 4.95026700  | 4.21236600 |
| H  | 15.09367600 | 4.88942900  | 5.48039000 |
| H  | 14.18715300 | 5.86497400  | 6.36313000 |
| H  | 24.72663500 | 10.71659800 | 2.53115700 |

Position of atoms in transition state (ts) structure for M<sup>(1)</sup> case:

|    |             |             |            |
|----|-------------|-------------|------------|
| Zn | 16.27949200 | 7.04310300  | 5.08939900 |
| Zn | 25.35611800 | 7.04308500  | 5.08939900 |
| Zn | 20.66713100 | 3.48899600  | 5.10362600 |
| P  | 22.23286600 | 6.10795600  | 5.62723500 |
| P  | 23.86002700 | 9.38007500  | 4.01375900 |
| P  | 18.62976800 | 8.23788500  | 6.58442700 |
| P  | 17.66578900 | 4.22297300  | 4.46449200 |
| O  | 22.26203300 | 4.76596100  | 4.85146200 |
| O  | 17.14979600 | 7.87039600  | 6.63272600 |
| O  | 27.14583100 | 7.07739100  | 6.03936100 |
| O  | 21.42033900 | 5.81241500  | 6.94894300 |
| O  | 19.58506700 | 7.43188800  | 7.40087300 |
| O  | 23.65868500 | 6.58000500  | 5.94450400 |
| O  | 14.77575000 | 5.81999000  | 5.69560600 |
| O  | 21.48888200 | 7.24027000  | 4.85845800 |
| O  | 18.77966000 | 9.80078100  | 6.89973600 |
| O  | 19.01401300 | 8.22220500  | 5.02305700 |
| O  | 24.01340700 | 10.63981200 | 3.08617000 |
| O  | 25.25165600 | 8.83690000  | 4.33323200 |
| O  | 16.63692100 | 8.47187000  | 3.65489400 |
| O  | 23.17399100 | 9.86800400  | 5.35357500 |
| O  | 22.93848600 | 8.37999100  | 3.31871500 |
| O  | 17.18690800 | 5.62371800  | 4.09766100 |
| O  | 25.02783800 | 5.32856300  | 3.97715500 |
| O  | 21.13698200 | 3.13318700  | 7.07865100 |
| O  | 16.37898200 | 3.68051700  | 5.36124900 |
| O  | 18.88845300 | 4.25687000  | 5.40165900 |
| O  | 17.87027900 | 3.23332700  | 3.33862400 |
| O  | 20.11882000 | 2.26737800  | 3.64147500 |
| H  | 20.66086900 | 6.46959700  | 7.19243400 |
| H  | 18.52921600 | 10.06766200 | 7.78993800 |
| H  | 19.87791400 | 7.78832400  | 4.82969100 |
| H  | 22.34443500 | 9.44629700  | 5.61743800 |
| H  | 22.19015000 | 7.81126200  | 3.95197800 |
| H  | 16.25765300 | 2.72752700  | 5.31101900 |
| H  | 17.56659200 | 8.70608500  | 3.83884900 |
| H  | 16.57679200 | 8.18039900  | 2.73948500 |
| H  | 20.57532900 | 1.78108700  | 2.95515800 |
| H  | 19.14343700 | 2.56705400  | 3.36698700 |
| H  | 21.31633800 | 4.04065300  | 7.40168000 |
| H  | 20.48140700 | 2.72748800  | 7.65311700 |
| H  | 27.50743900 | 6.42989700  | 6.65190700 |
| H  | 27.63917900 | 7.90206600  | 6.10388600 |
| H  | 25.30343600 | 5.05386100  | 3.09930300 |
| H  | 24.15192600 | 4.94029300  | 4.19099100 |
| H  | 15.11840900 | 4.90142800  | 5.60946800 |
| H  | 14.25189500 | 5.90876400  | 6.49522000 |
| H  | 24.87781300 | 11.06221600 | 3.05471800 |

Position of atoms in final structure for M<sup>(1)</sup> case:

|    |             |            |            |
|----|-------------|------------|------------|
| Zn | 16.27950600 | 7.04308900 | 5.08939900 |
|----|-------------|------------|------------|

|    |             |             |            |
|----|-------------|-------------|------------|
| Zn | 25.35614100 | 7.04310000  | 5.08939900 |
| Zn | 20.66709400 | 3.48899600  | 5.10362600 |
| P  | 22.32058900 | 6.02931700  | 5.73412300 |
| P  | 24.57364100 | 9.26946300  | 3.51996700 |
| P  | 18.60422000 | 8.19337500  | 6.73349700 |
| P  | 17.69184900 | 4.24846800  | 4.40807600 |
| O  | 22.25275300 | 4.75665400  | 4.87372300 |
| O  | 17.11426700 | 7.87957000  | 6.65258800 |
| O  | 26.57082400 | 6.35186700  | 6.56394400 |
| O  | 21.42549300 | 5.78147300  | 6.99240700 |
| O  | 19.53846400 | 7.26781900  | 7.43057200 |
| O  | 23.74608800 | 6.42904800  | 6.09283500 |
| O  | 14.75967200 | 5.80492200  | 5.59505800 |
| O  | 21.61139100 | 7.25337900  | 4.97828800 |
| O  | 18.74492700 | 9.64571000  | 7.37112900 |
| O  | 19.05117200 | 8.34963600  | 5.18254700 |
| O  | 25.07276500 | 9.55883300  | 2.04904900 |
| O  | 25.72121100 | 8.85497000  | 4.45868800 |
| O  | 16.70622700 | 8.54745600  | 3.75047900 |
| O  | 24.03494900 | 10.69370400 | 3.98355700 |
| O  | 23.53744700 | 8.17853900  | 3.45824500 |
| O  | 17.24643900 | 5.67505600  | 4.09559500 |
| O  | 24.82812700 | 5.72776000  | 3.55296300 |
| O  | 21.09230800 | 3.09519600  | 7.08283700 |
| O  | 16.36297400 | 3.68424400  | 5.22775600 |
| O  | 18.87532600 | 4.22306700  | 5.39437900 |
| O  | 17.92858300 | 3.31644400  | 3.24325800 |
| O  | 20.16851900 | 2.31389700  | 3.58327100 |
| H  | 20.62403100 | 6.43699900  | 7.21081100 |
| H  | 17.92595400 | 10.14642700 | 7.43574200 |
| H  | 19.93092900 | 7.97363900  | 4.98450100 |
| H  | 24.08459300 | 10.89062100 | 4.92461700 |
| H  | 22.21048500 | 7.72108400  | 4.33725600 |
| H  | 16.23874600 | 2.73433300  | 5.13900900 |
| H  | 17.63737300 | 8.74811600  | 3.96813300 |
| H  | 16.64934600 | 8.34483900  | 2.81149200 |
| H  | 20.65441700 | 1.86137000  | 2.89357100 |
| H  | 19.21266200 | 2.62151200  | 3.28396300 |
| H  | 21.24892700 | 3.99025500  | 7.44468500 |
| H  | 20.43586000 | 2.65240700  | 7.62832100 |
| H  | 26.10632100 | 5.96568700  | 7.31481400 |
| H  | 27.49264000 | 6.51450400  | 6.78026500 |
| H  | 24.33755900 | 6.28283200  | 2.92496300 |
| H  | 24.20893300 | 5.04286800  | 3.85756300 |
| H  | 15.10309900 | 4.88789900  | 5.48709400 |
| H  | 14.17178400 | 5.86037200  | 6.35179000 |
| H  | 25.62623700 | 10.33505800 | 1.91241000 |

Position of atoms in initial structure for M<sup>(2)</sup> case:

|    |             |            |            |
|----|-------------|------------|------------|
| Zn | 16.27965800 | 7.04302300 | 5.08944600 |
| Zn | 25.35603000 | 7.04309700 | 5.08938300 |
| Zn | 20.66705200 | 3.48895900 | 5.10362100 |

|   |             |             |            |
|---|-------------|-------------|------------|
| P | 22.28871400 | 6.07804800  | 5.62995800 |
| P | 24.42662300 | 9.62863600  | 3.49758600 |
| P | 18.58420100 | 8.21701700  | 6.74493900 |
| P | 17.62738900 | 4.19706900  | 4.98319200 |
| O | 21.84406300 | 4.99353200  | 4.66037700 |
| O | 17.10135200 | 8.13973700  | 6.43775500 |
| O | 26.96695300 | 7.67343700  | 6.16035700 |
| O | 21.64546200 | 5.69572000  | 7.06407400 |
| O | 19.50325000 | 8.60102900  | 5.62039900 |
| O | 23.79076500 | 6.13963100  | 5.80199200 |
| O | 14.73152300 | 6.02292100  | 5.93876700 |
| O | 21.75348500 | 7.50533900  | 5.26031400 |
| O | 19.08783700 | 6.76262000  | 7.28365900 |
| O | 18.75882300 | 9.12923300  | 8.02497300 |
| O | 22.86205700 | 9.61862100  | 3.77242400 |
| O | 25.10742000 | 8.90425800  | 4.67016900 |
| O | 15.90141100 | 8.41321400  | 3.62423400 |
| O | 24.60882600 | 8.47569900  | 2.29483900 |
| O | 24.91278800 | 10.91995800 | 3.01705600 |
| O | 17.18486900 | 5.51858300  | 4.36325800 |
| O | 25.74639300 | 6.32624700  | 3.22851400 |
| O | 21.56532800 | 2.98942000  | 6.88030200 |
| O | 16.46402200 | 3.96709200  | 6.12854400 |
| O | 18.97227400 | 4.39313000  | 5.74415000 |
| O | 17.66174800 | 2.98465000  | 4.09631500 |
| O | 19.95620700 | 2.08531800  | 3.91183700 |
| H | 20.86817900 | 6.20858400  | 7.36629300 |
| H | 18.88158900 | 5.96554300  | 6.74323400 |
| H | 19.48723300 | 9.75782000  | 7.99181300 |
| H | 24.52419400 | 8.86638100  | 1.41855700 |
| H | 20.79251900 | 7.87789300  | 5.36241300 |
| H | 16.41606600 | 3.06255700  | 6.45526900 |
| H | 16.25323600 | 9.30375000  | 3.73141200 |
| H | 15.81258600 | 8.20950000  | 2.68832500 |
| H | 20.31444400 | 1.63860400  | 3.14351900 |
| H | 18.94623600 | 2.29216300  | 3.83387400 |
| H | 21.71722500 | 3.81004800  | 7.38283500 |
| H | 21.47742400 | 2.23321500  | 7.46434900 |
| H | 27.73901700 | 7.36330600  | 6.63729200 |
| H | 26.99739400 | 8.62985900  | 6.01500900 |
| H | 25.42861100 | 7.04240500  | 2.62189700 |
| H | 25.51452600 | 5.46228000  | 2.88098100 |
| H | 15.05203000 | 5.11584400  | 6.11511200 |
| H | 14.15983000 | 6.32638500  | 6.64835700 |
| H | 22.51941600 | 8.89347800  | 4.31869000 |

Position of atoms in transition state structure for M<sup>(2)</sup> case:

|    |             |            |            |
|----|-------------|------------|------------|
| Zn | 16.27965100 | 7.04303300 | 5.08945200 |
| Zn | 25.35610300 | 7.04306700 | 5.08940900 |
| Zn | 20.66706700 | 3.48900400 | 5.10361100 |
| P  | 22.30977600 | 6.09414800 | 5.66129100 |
| P  | 24.42658900 | 9.62865000 | 3.49757100 |

|   |             |             |            |
|---|-------------|-------------|------------|
| P | 18.58420000 | 8.21701600  | 6.74492900 |
| P | 17.62734300 | 4.19703100  | 4.98319400 |
| O | 21.83804600 | 5.00831900  | 4.65929100 |
| O | 17.10694600 | 8.26783500  | 6.34762800 |
| O | 27.00890800 | 7.64311900  | 6.18461600 |
| O | 21.71006300 | 5.64005600  | 7.14884500 |
| O | 19.58520400 | 8.59993200  | 5.63216700 |
| O | 23.83796500 | 6.07815300  | 5.83825100 |
| O | 14.76724400 | 6.02330200  | 6.04575300 |
| O | 21.75514900 | 7.52601100  | 5.36285600 |
| O | 19.01347600 | 6.73524400  | 7.29333800 |
| O | 18.72795100 | 9.14240800  | 8.04296300 |
| O | 22.83706300 | 9.53056800  | 3.74283000 |
| O | 25.14366800 | 8.93863300  | 4.70083400 |
| O | 15.66667700 | 8.34839700  | 3.61118200 |
| O | 24.70195500 | 8.45547900  | 2.27138000 |
| O | 24.85750400 | 10.95756900 | 3.00191800 |
| O | 17.17732900 | 5.52084100  | 4.32084900 |
| O | 25.80436200 | 6.32238500  | 3.21411600 |
| O | 21.56352200 | 2.97142800  | 6.89816700 |
| O | 16.41657700 | 3.94307200  | 6.12569600 |
| O | 18.96134600 | 4.43165700  | 5.79317200 |
| O | 17.68211800 | 2.96140000  | 4.09647500 |
| O | 20.00341000 | 2.07269700  | 3.86106900 |
| H | 20.90653500 | 6.13652000  | 7.43080800 |
| H | 18.89781000 | 5.93283400  | 6.68901400 |
| H | 19.56708600 | 9.63219700  | 8.10324900 |
| H | 24.70357700 | 8.88020400  | 1.39635300 |
| H | 20.63410800 | 8.01531300  | 5.49011600 |
| H | 16.29509500 | 2.99654900  | 6.31670000 |
| H | 15.92701700 | 9.28353600  | 3.65097800 |
| H | 15.50721100 | 8.09921700  | 2.68671400 |
| H | 20.37697800 | 1.82892100  | 3.00117700 |
| H | 18.98374100 | 2.28475400  | 3.79493900 |
| H | 21.72626900 | 3.84839200  | 7.33827900 |
| H | 21.26956700 | 2.31667300  | 7.54950800 |
| H | 27.90413700 | 7.29563900  | 6.31578500 |
| H | 27.04434300 | 8.60023400  | 5.98784600 |
| H | 25.47248100 | 7.08083500  | 2.62478800 |
| H | 25.43646400 | 5.48434800  | 2.89259800 |
| H | 15.12769200 | 5.10520600  | 6.19328100 |
| H | 14.32236600 | 6.33921900  | 6.84791000 |
| H | 22.53165200 | 8.80425800  | 4.33993800 |

Position of atoms in final structure for M<sup>(2)</sup> case:

|    |             |            |            |
|----|-------------|------------|------------|
| Zn | 16.27978800 | 7.04300000 | 5.08952000 |
| Zn | 25.35608100 | 7.04305400 | 5.08940400 |
| Zn | 20.66709700 | 3.48902500 | 5.10361800 |
| P  | 22.47686800 | 5.92805400 | 5.71869500 |
| P  | 24.42659300 | 9.62864900 | 3.49757400 |
| P  | 18.58412000 | 8.21701900 | 6.74488200 |
| P  | 17.62727300 | 4.19705300 | 4.98316700 |

|   |             |             |            |
|---|-------------|-------------|------------|
| O | 22.07767100 | 4.79439900  | 4.77424200 |
| O | 17.49284300 | 8.44466700  | 5.72691400 |
| O | 27.07819200 | 7.66174000  | 5.99477900 |
| O | 21.83723300 | 5.39682600  | 7.14816200 |
| O | 20.00068100 | 8.68276300  | 6.35960100 |
| O | 23.99211600 | 5.98142600  | 5.93342800 |
| O | 15.25918400 | 6.19249500  | 6.62829300 |
| O | 21.87434500 | 7.29384500  | 5.42972900 |
| O | 18.62471200 | 6.69325500  | 7.16266000 |
| O | 18.18547800 | 8.99865200  | 8.05209900 |
| O | 22.87017800 | 9.37855000  | 3.72537700 |
| O | 25.16154000 | 8.91375300  | 4.64680500 |
| O | 15.27710000 | 8.31145200  | 3.85733800 |
| O | 24.78114300 | 8.60851400  | 2.22327600 |
| O | 24.75193300 | 11.00335800 | 3.12380500 |
| O | 17.00702400 | 5.43814500  | 4.34609800 |
| O | 25.55667800 | 6.31312600  | 3.18924600 |
| O | 21.32097700 | 2.78241500  | 6.91199000 |
| O | 16.63311000 | 3.94542600  | 6.27752300 |
| O | 19.02278300 | 4.55040300  | 5.58627300 |
| O | 17.66505000 | 2.93326900  | 4.17902100 |
| O | 19.99152300 | 2.11813600  | 3.83293900 |
| H | 21.86857000 | 6.03736000  | 7.86595700 |
| H | 18.92794800 | 5.95060700  | 6.56773300 |
| H | 18.90112700 | 9.27757200  | 8.63302700 |
| H | 24.78602400 | 9.07571600  | 1.38176700 |
| H | 20.74220300 | 8.08767000  | 5.94278500 |
| H | 16.55183400 | 3.01823300  | 6.52321600 |
| H | 15.61704000 | 9.21158500  | 3.80282400 |
| H | 14.69709100 | 8.12750000  | 3.11346700 |
| H | 20.34618300 | 1.80959300  | 2.99748100 |
| H | 18.98346900 | 2.27293400  | 3.79907400 |
| H | 21.64960400 | 3.56338600  | 7.39416600 |
| H | 21.76196900 | 1.97824600  | 7.19178100 |
| H | 27.88155400 | 7.34924900  | 6.41421000 |
| H | 27.11404400 | 8.61057500  | 5.80735600 |
| H | 25.35570700 | 7.06152900  | 2.57449700 |
| H | 25.13310400 | 5.50621500  | 2.88673200 |
| H | 15.57120100 | 5.26763800  | 6.73615900 |
| H | 15.02397000 | 6.57832800  | 7.47537700 |
| H | 22.58954500 | 8.66371000  | 4.32453200 |

Position of atoms in initial structure for M<sup>(3)</sup> case:

|    |             |            |             |
|----|-------------|------------|-------------|
| Zn | 16.27951500 | 7.04308300 | 5.08940700  |
| Zn | 25.35625100 | 7.04312100 | 5.08938000  |
| Zn | 21.70955400 | 7.04845500 | 13.40945700 |
| Zn | 20.66713100 | 3.48897700 | 5.10365000  |
| P  | 22.39500900 | 5.72756700 | 5.48835700  |
| P  | 18.54316000 | 6.28931200 | 13.96478500 |
| P  | 24.01317900 | 8.44466600 | 2.46970700  |
| P  | 20.36664500 | 8.45007900 | 10.78972900 |

|   |             |             |             |
|---|-------------|-------------|-------------|
| P | 18.72953700 | 7.81239300  | 6.97308300  |
| P | 17.52716200 | 4.17866800  | 4.47142800  |
| O | 22.21529300 | 4.57818400  | 4.50705000  |
| O | 18.82306200 | 4.84812300  | 13.25779000 |
| O | 17.26883400 | 7.44985200  | 6.77936300  |
| O | 25.90042400 | 7.55900600  | 6.97186300  |
| O | 22.38417400 | 7.20367700  | 15.30178800 |
| O | 21.43709100 | 5.36399500  | 6.67262500  |
| O | 17.69044800 | 5.89759200  | 15.25824700 |
| O | 19.66731900 | 6.80568200  | 7.62485800  |
| O | 23.84625500 | 6.00704800  | 5.88663000  |
| O | 19.95803700 | 6.68106700  | 14.40000400 |
| O | 14.74426100 | 5.91995800  | 5.81438100  |
| O | 21.80627700 | 7.11300300  | 4.90400700  |
| O | 17.78371200 | 7.20579100  | 13.07746400 |
| O | 18.83293700 | 9.18355000  | 7.71697700  |
| O | 19.23460800 | 8.07791700  | 5.44517800  |
| O | 22.88789500 | 7.53435100  | 1.80488800  |
| O | 20.70976100 | 9.26535200  | 9.59333600  |
| O | 24.02312000 | 8.15662400  | 3.99228600  |
| O | 21.37303400 | 8.32970300  | 11.95781900 |
| O | 16.91826500 | 8.74896600  | 4.16379400  |
| O | 25.32456300 | 8.17578000  | 1.81003800  |
| O | 18.94547000 | 8.86149400  | 11.32259000 |
| O | 23.51939200 | 9.95090400  | 2.33696000  |
| O | 20.22998900 | 6.87206300  | 10.34318500 |
| O | 17.10337100 | 5.59778700  | 4.09266500  |
| O | 26.65481800 | 6.97003700  | 3.59875600  |
| O | 21.43970100 | 5.38107000  | 12.23653400 |
| O | 20.31163200 | 2.39520700  | 6.81784000  |
| O | 16.23845800 | 3.68877800  | 5.40710000  |
| O | 18.77629200 | 4.16983700  | 5.39212800  |
| O | 17.67097000 | 3.16496100  | 3.36505700  |
| O | 20.05765400 | 2.32677800  | 3.55647500  |
| H | 20.70028300 | 6.00235100  | 7.07151300  |
| H | 16.91958000 | 6.45919300  | 15.39067600 |
| H | 19.56116700 | 9.31655500  | 8.39430500  |
| H | 20.14698900 | 7.81122800  | 5.23262500  |
| H | 22.53767900 | 7.73107100  | 4.64850300  |
| H | 18.48281500 | 8.29236900  | 11.98278400 |
| H | 23.70480000 | 10.37857600 | 1.49349800  |
| H | 19.95017900 | 6.75024900  | 9.41050800  |
| H | 15.97758900 | 2.78662900  | 5.19498900  |
| H | 26.41038700 | 8.28654500  | 7.33812400  |
| H | 25.23594000 | 7.25592000  | 7.60406500  |
| H | 26.27576100 | 7.42987400  | 2.76163200  |
| H | 27.41206000 | 6.41807900  | 3.39612600  |
| H | 19.07598000 | 2.55949700  | 3.35106500  |
| H | 20.53992100 | 2.15354800  | 2.74580100  |
| H | 19.45854900 | 2.78857900  | 7.05907000  |
| H | 20.26308000 | 1.43874500  | 6.89416000  |
| H | 15.05378200 | 4.99227600  | 5.69455600  |



|   |             |            |             |
|---|-------------|------------|-------------|
| H | 14.46173600 | 6.04060400 | 6.72568600  |
| H | 17.87813000 | 8.74336700 | 4.36219700  |
| H | 16.57951300 | 9.64233700 | 4.26350400  |
| H | 20.71467700 | 4.84651000 | 12.60362900 |
| H | 21.10442500 | 5.74125300 | 11.38196400 |
| H | 23.03113100 | 7.72037700 | 15.78698100 |
| H | 21.56772100 | 7.07912700 | 15.81203000 |
| H | 18.05115800 | 4.44892000 | 12.84384100 |
| H | 22.03980700 | 7.45386500 | 2.25600400  |

Position of atoms in transition state structure for M<sup>(3)</sup> case:

|    |             |             |             |
|----|-------------|-------------|-------------|
| Zn | 16.27945300 | 7.04308600  | 5.08937900  |
| Zn | 25.35623100 | 7.04311600  | 5.08939000  |
| Zn | 21.70958500 | 7.04843700  | 13.40948700 |
| Zn | 20.66715000 | 3.48896500  | 5.10365100  |
| P  | 22.39503200 | 5.72754400  | 5.48837800  |
| P  | 18.54313900 | 6.28930900  | 13.96477800 |
| P  | 24.01318600 | 8.44468400  | 2.46967800  |
| P  | 20.36666000 | 8.45010700  | 10.78972800 |
| P  | 18.76641400 | 7.84017400  | 7.01004900  |
| P  | 17.52716900 | 4.17867800  | 4.47143100  |
| O  | 22.18620500 | 4.65678200  | 4.39642600  |
| O  | 18.82946700 | 4.82563400  | 13.31563700 |
| O  | 17.30318400 | 7.50251800  | 6.78161800  |
| O  | 25.90384900 | 7.36098600  | 7.01609400  |
| O  | 22.42497500 | 7.24240000  | 15.27520500 |
| O  | 21.44716500 | 5.32434900  | 6.62162400  |
| O  | 17.67444600 | 5.94387900  | 15.25641000 |
| O  | 19.59558100 | 6.66557900  | 7.68696000  |
| O  | 23.87618500 | 5.96931900  | 5.85175000  |
| O  | 19.95862900 | 6.70201800  | 14.38764800 |
| O  | 14.74569900 | 5.92110300  | 5.79713100  |
| O  | 21.84650600 | 7.17442800  | 4.98041000  |
| O  | 17.80864600 | 7.18659000  | 13.03401900 |
| O  | 19.02302800 | 9.07846400  | 7.84429400  |
| O  | 19.34208500 | 8.00500400  | 5.51301300  |
| O  | 22.55049100 | 8.01469800  | 1.99641500  |
| O  | 20.69323300 | 9.31023900  | 9.58312500  |
| O  | 24.12070500 | 8.23837100  | 3.99552300  |
| O  | 21.40276100 | 8.35308100  | 11.91634000 |
| O  | 17.04033900 | 8.67872500  | 4.12594800  |
| O  | 25.09427800 | 7.72068300  | 1.72336700  |
| O  | 18.95646500 | 8.86542800  | 11.31709800 |
| O  | 23.97869400 | 10.01242300 | 2.24697700  |
| O  | 20.25607400 | 6.90333700  | 10.30719200 |
| O  | 17.13868100 | 5.61352300  | 4.11418200  |
| O  | 26.57439900 | 6.74799700  | 3.54703300  |
| O  | 21.43592200 | 5.39023200  | 12.23806700 |
| O  | 20.24548000 | 2.21986600  | 6.68944100  |
| O  | 16.19663700 | 3.69463300  | 5.36100300  |
| O  | 18.74227300 | 4.11212600  | 5.42624900  |
| O  | 17.66826500 | 3.19094700  | 3.34167100  |

|   |             |             |             |
|---|-------------|-------------|-------------|
| O | 20.06202300 | 2.34367900  | 3.52497700  |
| H | 20.28801100 | 6.09004200  | 7.18675500  |
| H | 16.92575400 | 6.53438700  | 15.39181400 |
| H | 19.90650400 | 9.26825100  | 8.70969800  |
| H | 20.27998400 | 7.78239700  | 5.31380900  |
| H | 22.54006700 | 7.76584800  | 4.61997000  |
| H | 18.47640700 | 8.28187500  | 11.96234400 |
| H | 23.96909400 | 10.30985900 | 1.33103600  |
| H | 19.94025800 | 6.74168800  | 9.38726200  |
| H | 15.91692400 | 2.80929600  | 5.10658600  |
| H | 26.34164200 | 8.06409000  | 7.50179500  |
| H | 25.19931800 | 6.95543400  | 7.54128100  |
| H | 26.13079800 | 7.09401500  | 2.69147500  |
| H | 27.26370500 | 6.10840200  | 3.36171400  |
| H | 19.08454700 | 2.57755000  | 3.32376400  |
| H | 20.55495000 | 2.26038700  | 2.70620200  |
| H | 19.38078300 | 2.60662800  | 6.90218400  |
| H | 20.14939800 | 1.26984600  | 6.57786800  |
| H | 15.05612500 | 4.99147200  | 5.67087900  |
| H | 14.42667600 | 6.03075500  | 6.69719900  |
| H | 17.99983400 | 8.59418100  | 4.30656700  |
| H | 16.78763400 | 9.60018400  | 4.22543600  |
| H | 20.71468500 | 4.84582300  | 12.59943800 |
| H | 21.12805100 | 5.71731800  | 11.36465800 |
| H | 23.13569800 | 7.69254800  | 15.73734400 |
| H | 21.64457300 | 7.12875200  | 15.83893600 |
| H | 18.05411400 | 4.36908900  | 12.97293100 |
| H | 22.40966700 | 7.07092600  | 1.85852000  |

Position of atoms in final structure for M<sup>(3)</sup> case:

|    |             |            |             |
|----|-------------|------------|-------------|
| Zn | 16.27953300 | 7.04310300 | 5.08943600  |
| Zn | 25.35614900 | 7.04310500 | 5.08937900  |
| Zn | 21.70955000 | 7.04846400 | 13.40944400 |
| Zn | 20.66715600 | 3.48896800 | 5.10364400  |
| P  | 22.39506600 | 5.72753400 | 5.48842300  |
| P  | 18.54315300 | 6.28930300 | 13.96478900 |
| P  | 24.01322800 | 8.44471400 | 2.46964500  |
| P  | 20.36663500 | 8.45006900 | 10.78970900 |
| P  | 18.72341100 | 7.81659600 | 6.99284700  |
| P  | 17.52713500 | 4.17866700 | 4.47143100  |
| O  | 22.18600400 | 4.66961300 | 4.38187900  |
| O  | 18.82547000 | 4.82068700 | 13.32714000 |
| O  | 17.25092900 | 7.49369300 | 6.78054100  |
| O  | 25.91722800 | 7.30152700 | 7.02156700  |
| O  | 22.45610200 | 7.22013200 | 15.26129100 |
| O  | 21.45526500 | 5.30219500 | 6.61786500  |
| O  | 17.66625600 | 5.96102200 | 15.25292400 |
| O  | 19.51124900 | 6.59460600 | 7.67504700  |
| O  | 23.87824500 | 5.96951400 | 5.85249800  |
| O  | 19.96051300 | 6.70092800 | 14.38483100 |
| O  | 14.72902600 | 5.91535300 | 5.76818200  |

|   |             |             |             |
|---|-------------|-------------|-------------|
| O | 21.84496100 | 7.17885400  | 4.99515500  |
| O | 17.82174000 | 7.18392200  | 13.01936500 |
| O | 19.04382100 | 9.02992700  | 7.81175700  |
| O | 19.29016200 | 7.91457300  | 5.48130600  |
| O | 22.55043200 | 8.00634200  | 2.00457800  |
| O | 20.74023000 | 9.41918500  | 9.65425700  |
| O | 24.12709900 | 8.24549900  | 3.99640700  |
| O | 21.39665200 | 8.34499000  | 11.91204900 |
| O | 17.03492200 | 8.66609500  | 4.09499100  |
| O | 25.09593700 | 7.72360300  | 1.72279300  |
| O | 18.94927800 | 8.84280100  | 11.29531900 |
| O | 23.97011200 | 10.01108800 | 2.23769700  |
| O | 20.30145500 | 6.95576300  | 10.20584600 |
| O | 17.13321300 | 5.60916900  | 4.10824300  |
| O | 26.57664700 | 6.75162300  | 3.54676400  |
| O | 21.41853300 | 5.40931000  | 12.20946800 |
| O | 20.22365600 | 2.20313100  | 6.67458400  |
| O | 16.19705000 | 3.68818100  | 5.35802900  |
| O | 18.74139200 | 4.11536000  | 5.42787200  |
| O | 17.67425200 | 3.18686000  | 3.34444200  |
| O | 20.06249900 | 2.34181500  | 3.52681600  |
| H | 20.19326100 | 6.03785500  | 7.17299600  |
| H | 16.92143400 | 6.55751100  | 15.38435800 |
| H | 20.08661400 | 9.39767700  | 8.85311100  |
| H | 20.23919300 | 7.73477400  | 5.29982200  |
| H | 22.53482500 | 7.77439900  | 4.63670700  |
| H | 18.46151900 | 8.25373500  | 11.93640000 |
| H | 23.95884100 | 10.30247500 | 1.31987400  |
| H | 19.94493400 | 6.79876900  | 9.28906000  |
| H | 15.91953100 | 2.80422500  | 5.09658000  |
| H | 26.36148800 | 7.97990800  | 7.53520900  |
| H | 25.20672800 | 6.87984800  | 7.52628700  |
| H | 26.13202600 | 7.09844800  | 2.69242900  |
| H | 27.25866300 | 6.10483700  | 3.35951200  |
| H | 19.08294700 | 2.57929900  | 3.32749300  |
| H | 20.55532400 | 2.27065300  | 2.70676700  |
| H | 19.36311600 | 2.60420700  | 6.87975100  |
| H | 20.10365800 | 1.26075200  | 6.52569200  |
| H | 15.04444700 | 4.98810200  | 5.64214000  |
| H | 14.41616200 | 6.02169800  | 6.67086300  |
| H | 17.99399600 | 8.55446700  | 4.26358500  |
| H | 16.80598000 | 9.58919200  | 4.23104500  |
| H | 20.69066900 | 4.86219400  | 12.55360000 |
| H | 21.15004600 | 5.71880300  | 11.31978300 |
| H | 23.20279300 | 7.61781700  | 15.71499400 |
| H | 21.69750500 | 7.10217000  | 15.85229200 |
| H | 18.04772500 | 4.35079000  | 13.00825400 |
| H | 22.40258300 | 7.05893800  | 1.90212000  |

Position of atoms in initial structure for R<sup>(1)</sup> case:

|    |             |            |            |
|----|-------------|------------|------------|
| Zn | 16.27955200 | 7.04306500 | 5.08944200 |
| Zn | 25.35591100 | 7.04317100 | 5.08933000 |

|    |             |             |            |
|----|-------------|-------------|------------|
| Zn | 20.66712600 | 3.48902400  | 5.10364800 |
| P  | 22.78072400 | 5.87426200  | 6.15117900 |
| P  | 24.42454500 | 9.62750100  | 3.49668100 |
| P  | 19.07580100 | 7.77076200  | 6.80622200 |
| P  | 17.54677600 | 4.12449300  | 5.25218100 |
| O  | 22.18951800 | 4.91884000  | 5.11941200 |
| O  | 17.63364200 | 7.68983400  | 6.35518700 |
| O  | 27.06780900 | 6.31530000  | 5.90218500 |
| O  | 22.14052900 | 5.49773500  | 7.57808500 |
| O  | 20.07923800 | 8.27230900  | 5.79620700 |
| O  | 24.29830000 | 5.84248100  | 6.27929500 |
| O  | 14.88345700 | 6.26645300  | 6.36273400 |
| O  | 22.43611700 | 7.36834400  | 5.81794500 |
| O  | 19.55758100 | 6.34330300  | 7.35288300 |
| O  | 19.11543700 | 8.67984400  | 8.11722800 |
| O  | 25.28060800 | 10.51121000 | 2.47753500 |
| O  | 25.40566400 | 8.86827700  | 4.40281300 |
| O  | 15.95119000 | 8.34213400  | 3.62197300 |
| O  | 23.69667000 | 10.67426400 | 4.46701000 |
| O  | 23.44641800 | 8.80347200  | 2.72076300 |
| O  | 17.06280000 | 5.34351800  | 4.47071100 |
| O  | 24.30007100 | 6.35354400  | 3.42864400 |
| O  | 21.47063900 | 2.86290700  | 6.92361200 |
| O  | 16.48039900 | 4.11902200  | 6.52419600 |
| O  | 18.95269400 | 4.36407800  | 5.89415200 |
| O  | 17.49273600 | 2.77525600  | 4.59551500 |
| O  | 19.75464300 | 1.64733000  | 4.86359500 |
| H  | 21.24721300 | 5.87980300  | 7.73242700 |
| H  | 19.22244500 | 5.54163600  | 6.82259600 |
| H  | 22.83249900 | 10.97191000 | 4.16619200 |
| H  | 21.48871600 | 7.73757400  | 5.75331600 |
| H  | 16.41789000 | 3.26311300  | 6.95973000 |
| H  | 16.73319000 | 8.57337800  | 2.99777300 |
| H  | 15.26975900 | 9.01525700  | 3.57768400 |
| H  | 20.00517100 | 0.85486800  | 4.38689600 |
| H  | 18.78355900 | 1.88516000  | 4.71039000 |
| H  | 21.83004000 | 3.58257200  | 7.46900700 |
| H  | 20.99359200 | 2.23195600  | 7.46788100 |
| H  | 26.92596800 | 5.65302900  | 6.58757600 |
| H  | 27.98896700 | 6.58323700  | 5.86485900 |
| H  | 23.87774700 | 7.11819600  | 2.96827300 |
| H  | 23.65479500 | 5.64433300  | 3.55622800 |
| H  | 15.21903800 | 5.35775800  | 6.53323100 |
| H  | 14.70650100 | 6.69217200  | 7.20649200 |
| H  | 19.83154200 | 9.32183700  | 8.13548900 |
| N  | 20.18952700 | 4.16210400  | 3.15359300 |
| N  | 19.47634200 | 5.75568900  | 1.84003500 |
| N  | 19.72253300 | 9.08312400  | 0.75378700 |
| N  | 18.09106800 | 8.84449800  | 2.19765900 |
| C  | 18.91148600 | 4.59287100  | 1.37417900 |
| C  | 19.36102700 | 3.61137000  | 2.20240600 |
| C  | 20.22740500 | 5.46059100  | 2.91337100 |

|   |             |             |             |
|---|-------------|-------------|-------------|
| C | 20.32257300 | 8.99056300  | 1.99160100  |
| C | 18.38268400 | 8.99958300  | 0.92329200  |
| C | 19.29152100 | 8.84320700  | 2.87807700  |
| H | 20.20014900 | 9.23668000  | -0.12123200 |
| H | 21.39840400 | 9.01231500  | 2.12557800  |
| H | 19.35119000 | 8.72700500  | 3.95190900  |
| H | 17.67676900 | 9.05671700  | 0.10969800  |
| H | 18.24839100 | 4.57045100  | 0.52729600  |
| H | 19.31800700 | 6.68762000  | 1.48851100  |
| H | 20.76319400 | 6.19324600  | 3.49748000  |
| H | 19.11565400 | 2.56339400  | 2.20002200  |
| H | 26.00654300 | 11.00603200 | 2.87169900  |

Position of atoms in transition state structure for R<sup>(1)</sup> case:

|    |             |             |            |
|----|-------------|-------------|------------|
| Zn | 16.27955700 | 7.04304900  | 5.08945300 |
| Zn | 25.35580000 | 7.04319500  | 5.08933300 |
| Zn | 20.66706900 | 3.48906300  | 5.10361200 |
| P  | 22.80201800 | 5.85019800  | 6.16085900 |
| P  | 24.41890800 | 9.61702600  | 3.62705400 |
| P  | 19.13871600 | 7.68644200  | 6.76064900 |
| P  | 17.51909500 | 4.10723600  | 5.24773000 |
| O  | 22.05998300 | 4.95553800  | 5.19368800 |
| O  | 17.67806400 | 7.61214800  | 6.35935700 |
| O  | 26.98387100 | 6.61449700  | 6.25565400 |
| O  | 22.28387600 | 5.49644600  | 7.64446100 |
| O  | 20.11344400 | 8.13129500  | 5.70098200 |
| O  | 24.32431200 | 5.72315000  | 6.13366700 |
| O  | 14.91061200 | 6.29314800  | 6.40974900 |
| O  | 22.54751400 | 7.37274800  | 5.88252400 |
| O  | 19.61326000 | 6.27903100  | 7.36565000 |
| O  | 19.23987300 | 8.64778400  | 8.03483900 |
| O  | 25.13599100 | 9.08391200  | 2.23233000 |
| O  | 25.22451900 | 8.93128500  | 4.72576600 |
| O  | 15.96627400 | 8.34750700  | 3.62683700 |
| O  | 24.87259200 | 11.15495300 | 3.66420300 |
| O  | 22.96352700 | 9.41610800  | 3.50151100 |
| O  | 17.03392000 | 5.32721200  | 4.46541300 |
| O  | 25.40929200 | 6.52203700  | 3.09998000 |
| O  | 21.46521400 | 2.84999400  | 6.93737500 |
| O  | 16.45108000 | 4.10690800  | 6.52092300 |
| O  | 18.92560400 | 4.33138700  | 5.88693000 |
| O  | 17.45317400 | 2.75696200  | 4.59156900 |
| O  | 19.73295300 | 1.65662800  | 4.86544900 |
| H  | 21.38074900 | 5.84406900  | 7.81525600 |
| H  | 19.26265800 | 5.48055800  | 6.84751900 |
| H  | 24.15264300 | 11.77861200 | 3.52674600 |
| H  | 21.61992100 | 7.73631700  | 5.71167500 |
| H  | 16.37428600 | 3.24656700  | 6.94492900 |
| H  | 16.75215800 | 8.56110800  | 2.99353000 |
| H  | 15.32046700 | 9.05627200  | 3.61300200 |
| H  | 19.97277200 | 0.85723200  | 4.39530800 |
| H  | 18.76116800 | 1.90100300  | 4.71045400 |

|   |             |            |             |
|---|-------------|------------|-------------|
| H | 21.86608900 | 3.55017200 | 7.47729600  |
| H | 20.96914900 | 2.24201800 | 7.49078600  |
| H | 26.76332600 | 5.99995800 | 6.96489300  |
| H | 27.73326700 | 7.16242900 | 6.50190300  |
| H | 25.34124600 | 7.29221300 | 2.49870100  |
| H | 25.04472600 | 5.73040400 | 2.69797600  |
| H | 15.23442100 | 5.37485400 | 6.55639500  |
| H | 14.82155800 | 6.72082400 | 7.26671500  |
| H | 19.92645100 | 9.31761400 | 7.96287500  |
| N | 20.18952300 | 4.16206700 | 3.15358100  |
| N | 19.27551800 | 5.78208700 | 2.00379000  |
| N | 19.69988600 | 9.29218900 | 0.78260500  |
| N | 18.09107100 | 8.84449600 | 2.19765400  |
| C | 18.78787800 | 4.61173500 | 1.47299200  |
| C | 19.36448100 | 3.61457100 | 2.19692000  |
| C | 20.10038500 | 5.47494700 | 3.01732400  |
| C | 20.29589300 | 9.20529700 | 2.02054200  |
| C | 18.37470900 | 9.07504800 | 0.93102100  |
| C | 19.28106700 | 8.93209000 | 2.89169300  |
| H | 20.16656900 | 9.50273500 | -0.08556600 |
| H | 21.35370900 | 9.33870700 | 2.20001100  |
| H | 19.35256600 | 8.77632900 | 3.95953000  |
| H | 17.67173100 | 9.09465100 | 0.11328500  |
| H | 18.08194800 | 4.59435600 | 0.66134700  |
| H | 18.97542700 | 6.71858500 | 1.77555300  |
| H | 20.58981200 | 6.20811700 | 3.64116100  |
| H | 19.21567800 | 2.55135700 | 2.11552000  |
| H | 25.91624700 | 9.58855500 | 1.97725500  |

Position of atoms in final structure for R<sup>(1)</sup> case:

|    |             |             |            |
|----|-------------|-------------|------------|
| Zn | 16.27955600 | 7.04307300  | 5.08942500 |
| Zn | 25.35575600 | 7.04306500  | 5.08905500 |
| Zn | 20.66721200 | 3.48903600  | 5.10373000 |
| P  | 22.87111700 | 5.81892400  | 6.02872600 |
| P  | 24.44336400 | 9.62420200  | 3.53673100 |
| P  | 19.18861600 | 7.71913300  | 6.74183600 |
| P  | 17.51572700 | 4.10750600  | 5.26655700 |
| O  | 22.21534700 | 4.83467200  | 5.07655800 |
| O  | 17.76872500 | 7.69202700  | 6.20213600 |
| O  | 27.26995400 | 7.04313900  | 5.79579200 |
| O  | 22.19840100 | 5.64204000  | 7.47078000 |
| O  | 20.27167000 | 8.11893000  | 5.77997300 |
| O  | 24.38170900 | 5.69850200  | 6.17118900 |
| O  | 14.95134000 | 6.31803300  | 6.45391900 |
| O  | 22.68515100 | 7.30678900  | 5.52582000 |
| O  | 19.54706100 | 6.29211800  | 7.38218300 |
| O  | 19.19726800 | 8.68002200  | 8.01741500 |
| O  | 24.42942500 | 8.62594000  | 2.22691300 |
| O  | 25.35886500 | 8.89063900  | 4.51283200 |
| O  | 15.89517000 | 8.22771000  | 3.53238800 |
| O  | 25.27389900 | 10.84217600 | 2.87426500 |
| O  | 23.08458500 | 10.02067200 | 3.95927400 |

|   |             |             |            |
|---|-------------|-------------|------------|
| O | 17.00662600 | 5.31267800  | 4.47877800 |
| O | 24.76311600 | 6.18888900  | 3.29890000 |
| O | 21.40372300 | 2.94665600  | 6.99284400 |
| O | 16.47900500 | 4.12540900  | 6.56642400 |
| O | 18.93323500 | 4.35843800  | 5.87514800 |
| O | 17.44741300 | 2.74694100  | 4.63631600 |
| O | 19.73911100 | 1.65901100  | 4.88861300 |
| H | 21.26757700 | 5.95642600  | 7.57072700 |
| H | 19.20506800 | 5.49825700  | 6.84686200 |
| H | 25.01385300 | 11.71093700 | 3.19635800 |
| H | 21.78210600 | 7.74765600  | 5.55073400 |
| H | 16.40706100 | 3.27067600  | 7.00262200 |
| H | 16.64170300 | 8.46079000  | 2.88363000 |
| H | 15.12114900 | 8.76810200  | 3.36429600 |
| H | 19.98655500 | 0.84550200  | 4.44756600 |
| H | 18.76504700 | 1.88677800  | 4.73810200 |
| H | 21.82442100 | 3.65938500  | 7.49855700 |
| H | 20.88065100 | 2.38995000  | 7.57464900 |
| H | 27.66757300 | 6.43866100  | 6.42782700 |
| H | 27.78457200 | 7.85331300  | 5.72689400 |
| H | 24.54969600 | 6.86559100  | 2.62960900 |
| H | 24.08260700 | 5.50558600  | 3.33098100 |
| H | 15.27578100 | 5.40311800  | 6.62174000 |
| H | 14.80662100 | 6.75693300  | 7.29690700 |
| H | 19.90475700 | 9.33226700  | 8.00878700 |
| N | 20.18956200 | 4.16214200  | 3.15359800 |
| N | 19.23167800 | 5.78902800  | 2.04459400 |
| N | 19.92254700 | 9.77445200  | 1.43780800 |
| N | 18.09106400 | 8.84449900  | 2.19766900 |
| C | 18.74398900 | 4.62009700  | 1.51182100 |
| C | 19.34614200 | 3.61927600  | 2.21040100 |
| C | 20.08400800 | 5.47602500  | 3.03349700 |
| C | 20.19666300 | 9.42365700  | 2.74133600 |
| C | 18.65186900 | 9.41610400  | 1.15077500 |
| C | 19.04411000 | 8.85213800  | 3.19517300 |
| H | 20.55433600 | 10.24773600 | 0.81149700 |
| H | 21.14862500 | 9.62303200  | 3.22074100 |
| H | 18.85019100 | 8.46009900  | 4.17688700 |
| H | 18.18698800 | 9.58921400  | 0.19313500 |
| H | 18.02082800 | 4.60568000  | 0.7154220  |
| H | 18.91654900 | 6.72595000  | 1.83043000 |
| H | 20.57964100 | 6.20908600  | 3.65330000 |
| H | 19.20676700 | 2.55562800  | 2.11797500 |
| H | 24.53976300 | 9.07940600  | 1.38578300 |

Position of atoms in initial structure for R<sup>(2)</sup> case:

|    |             |            |            |
|----|-------------|------------|------------|
| Zn | 16.27955000 | 7.04307000 | 5.08944200 |
| Zn | 25.35594300 | 7.04315700 | 5.08935000 |
| Zn | 20.66711400 | 3.48901400 | 5.10364500 |
| P  | 22.38188200 | 6.03436800 | 5.79535400 |
| P  | 24.42452600 | 9.62752200 | 3.49666500 |
| P  | 18.58345400 | 8.21481400 | 6.74841000 |

|   |             |             |            |
|---|-------------|-------------|------------|
| P | 17.64931600 | 4.17661800  | 4.57791600 |
| O | 22.11374600 | 4.88934200  | 4.84924600 |
| O | 17.13256600 | 7.74957000  | 6.76364700 |
| O | 27.19192400 | 6.60544600  | 5.80155900 |
| O | 21.56709100 | 5.74540500  | 7.13148000 |
| O | 19.08986100 | 7.64922800  | 5.33094800 |
| O | 23.85051700 | 6.29302700  | 6.10397100 |
| O | 14.79861400 | 5.85374200  | 5.83290200 |
| O | 21.75498600 | 7.40351400  | 5.24775500 |
| O | 19.48442900 | 7.27258700  | 7.77201900 |
| O | 18.93335600 | 9.62880300  | 6.99224400 |
| O | 24.83333500 | 11.15165000 | 3.33260400 |
| O | 25.35023100 | 8.94509900  | 4.51738000 |
| O | 16.49874600 | 8.64797000  | 3.86771700 |
| O | 23.00482400 | 9.64925700  | 4.32385300 |
| O | 24.22935100 | 8.95491200  | 2.18909800 |
| O | 17.20272000 | 5.58536300  | 4.17368400 |
| O | 24.64322700 | 6.42840800  | 3.25141600 |
| O | 21.28289300 | 3.00337200  | 7.01076700 |
| O | 16.35421500 | 3.67847600  | 5.48895300 |
| O | 18.87998100 | 4.20103800  | 5.52034200 |
| O | 17.83760400 | 3.18371900  | 3.46257300 |
| O | 20.35260800 | 2.48475500  | 3.39814200 |
| H | 20.77102700 | 6.30286500  | 7.34852100 |
| H | 19.60494300 | 7.70867000  | 8.62366200 |
| H | 22.25048400 | 10.05841700 | 3.87081700 |
| H | 20.04802200 | 7.65327500  | 5.16911500 |
| H | 16.18679600 | 2.73482700  | 5.40096800 |
| H | 17.41273700 | 8.81622800  | 3.52171700 |
| H | 16.07828700 | 9.49896800  | 4.01558100 |
| H | 20.75080100 | 2.96077700  | 2.63825800 |
| H | 19.35985600 | 2.53395900  | 3.27015900 |
| H | 21.41697200 | 3.85343000  | 7.46635400 |
| H | 20.78292700 | 2.41112600  | 7.57915500 |
| H | 27.43672400 | 5.86024200  | 6.35850800 |
| H | 27.95617600 | 7.17154500  | 5.65242400 |
| H | 24.53647000 | 7.15964200  | 2.60218000 |
| H | 23.88809900 | 5.82587100  | 3.16955900 |
| H | 15.13515000 | 4.93387700  | 5.72962800 |
| H | 14.48393900 | 5.97539100  | 6.73294500 |
| H | 22.32849900 | 8.18311500  | 5.07594400 |
| N | 20.99597000 | 4.72782700  | 1.86953500 |
| N | 20.29461600 | 6.72461000  | 2.48847100 |
| N | 20.28598200 | 10.90795200 | 1.81055900 |
| N | 18.97748000 | 9.56698200  | 2.95968600 |
| C | 21.57882500 | 6.89709900  | 2.03458700 |
| C | 21.99159000 | 5.64693200  | 1.64923000 |
| C | 19.98766900 | 5.41415300  | 2.36167200 |
| C | 20.46936800 | 11.23304400 | 3.13742500 |
| C | 19.38074900 | 9.91066900  | 1.75352400 |
| C | 19.65284600 | 10.38707500 | 3.84085600 |
| H | 20.74459000 | 11.33797800 | 1.02147600 |



|   |             |             |            |
|---|-------------|-------------|------------|
| H | 21.09142200 | 12.05902100 | 3.44397400 |
| H | 19.48489300 | 10.33540500 | 4.91117400 |
| H | 19.05676100 | 9.46119600  | 0.82723400 |
| H | 22.07315100 | 7.85721000  | 1.99596700 |
| H | 19.67599900 | 7.43364700  | 2.86562600 |
| H | 19.00754200 | 5.02394700  | 2.58800600 |
| H | 22.92113000 | 5.36230100  | 1.17716000 |
| H | 25.25621500 | 11.55945500 | 4.09618700 |

Position of atoms in transition state structure for R<sup>(2)</sup> case:

|    |             |             |            |
|----|-------------|-------------|------------|
| Zn | 16.27955000 | 7.04307000  | 5.08944200 |
| Zn | 25.35594300 | 7.04315700  | 5.08935000 |
| Zn | 20.66711400 | 3.48901400  | 5.10364500 |
| P  | 22.38188200 | 6.03436800  | 5.79535400 |
| P  | 24.42452600 | 9.62752200  | 3.49666500 |
| P  | 18.58345400 | 8.21481400  | 6.74841000 |
| P  | 17.64931600 | 4.17661800  | 4.57791600 |
| O  | 22.10170800 | 4.84530500  | 4.91500900 |
| O  | 17.13256600 | 7.74957000  | 6.76364700 |
| O  | 26.92956000 | 6.29569500  | 6.10599500 |
| O  | 21.55062100 | 5.87672400  | 7.14851200 |
| O  | 19.33382500 | 7.20462600  | 5.74881300 |
| O  | 23.85296800 | 6.26081800  | 6.12220500 |
| O  | 14.71516000 | 5.86913000  | 5.60556100 |
| O  | 21.84402100 | 7.36868300  | 5.09126300 |
| O  | 19.34391700 | 7.75139200  | 8.10245000 |
| O  | 18.82717000 | 9.63664700  | 6.38568500 |
| O  | 24.88916700 | 11.12844800 | 3.28274800 |
| O  | 25.34570000 | 8.93492300  | 4.51636200 |
| O  | 16.87878800 | 8.77523100  | 4.13124900 |
| O  | 23.02920500 | 9.71281100  | 4.34676800 |
| O  | 24.19328100 | 8.92700700  | 2.20725000 |
| O  | 17.26689700 | 5.61240800  | 4.19499000 |
| O  | 24.73716200 | 6.41720100  | 3.23080500 |
| O  | 21.08928600 | 3.08719900  | 7.10348400 |
| O  | 16.30066000 | 3.71620800  | 5.43283300 |
| O  | 18.84541200 | 4.10729500  | 5.55432700 |
| O  | 17.82993700 | 3.20744700  | 3.43900800 |
| O  | 20.29961000 | 2.32893600  | 3.50741100 |
| H  | 20.74033000 | 6.41096200  | 7.27231000 |
| H  | 19.17359800 | 8.27934100  | 8.88865700 |
| H  | 22.27144000 | 10.11975400 | 3.89434700 |
| H  | 20.07127800 | 7.58451200  | 5.24794800 |
| H  | 16.14005600 | 2.76849900  | 5.38380000 |
| H  | 17.62425900 | 8.72941100  | 3.50032700 |
| H  | 17.13139800 | 9.44917100  | 4.78356700 |
| H  | 20.74703100 | 2.67475800  | 2.70889300 |
| H  | 19.31511100 | 2.43355100  | 3.35373200 |
| H  | 21.31186800 | 3.93932800  | 7.51487900 |
| H  | 20.34072500 | 2.71629300  | 7.58272300 |
| H  | 26.78359800 | 5.69684300  | 6.84593400 |
| H  | 27.86814700 | 6.47870300  | 6.00465300 |

|   |             |             |            |
|---|-------------|-------------|------------|
| H | 24.61654600 | 7.16621300  | 2.60307300 |
| H | 23.99552600 | 5.80260200  | 3.11917700 |
| H | 15.06096100 | 4.94651300  | 5.56012900 |
| H | 14.15845700 | 5.97740400  | 6.38030400 |
| H | 22.39532300 | 8.17939200  | 5.04197500 |
| N | 21.15075900 | 4.41585500  | 1.87175000 |
| N | 20.50602100 | 6.44360200  | 2.44724800 |
| N | 20.62535500 | 10.58281600 | 1.53018100 |
| N | 19.43946100 | 9.28122200  | 2.85014000 |
| C | 21.79540900 | 6.57014100  | 1.99894100 |
| C | 22.17414200 | 5.30056900  | 1.63890600 |
| C | 20.15966900 | 5.14257900  | 2.34305900 |
| C | 20.65358900 | 11.17100600 | 2.77418500 |
| C | 19.88401900 | 9.46113600  | 1.62216900 |
| C | 19.91486000 | 10.35014500 | 3.58517200 |
| H | 21.09160800 | 10.91849900 | 0.70080100 |
| H | 21.14297900 | 12.11517900 | 2.95122800 |
| H | 19.67691700 | 10.44995000 | 4.63774400 |
| H | 19.70640200 | 8.80541900  | 0.78289300 |
| H | 22.30651700 | 7.52226800  | 1.95191200 |
| H | 19.92851300 | 7.18250200  | 2.83206200 |
| H | 19.16583400 | 4.78183800  | 2.56540700 |
| H | 23.09930400 | 4.97763400  | 1.18306700 |
| H | 25.33174100 | 11.54409000 | 4.03086900 |

Position of atoms in final structure for R<sup>(2)</sup> case:

|    |             |             |            |
|----|-------------|-------------|------------|
| Zn | 16.27946500 | 7.04326900  | 5.08942800 |
| Zn | 25.35599700 | 7.04315600  | 5.08936300 |
| Zn | 20.66718900 | 3.48893800  | 5.10370600 |
| P  | 22.38191600 | 6.03437700  | 5.79528600 |
| P  | 24.42449600 | 9.62752100  | 3.49668600 |
| P  | 18.58342900 | 8.21493800  | 6.74839000 |
| P  | 17.64926600 | 4.17661000  | 4.57793700 |
| O  | 22.07306300 | 4.85735100  | 4.89817600 |
| O  | 17.13259200 | 7.74932700  | 6.76363400 |
| O  | 26.97053200 | 6.40121000  | 6.12563600 |
| O  | 21.68463200 | 5.77919600  | 7.20811200 |
| O  | 19.40030100 | 6.79842400  | 6.83865600 |
| O  | 23.86622600 | 6.25680200  | 6.05832200 |
| O  | 14.73429900 | 5.85918700  | 5.65829800 |
| O  | 21.73199600 | 7.32793600  | 5.16446200 |
| O  | 18.96074700 | 8.88308400  | 8.14027300 |
| O  | 19.01289700 | 9.07923400  | 5.62160000 |
| O  | 24.87554600 | 11.13694300 | 3.30883300 |
| O  | 25.27020200 | 8.96710200  | 4.59816300 |
| O  | 16.87025000 | 8.64801500  | 3.98175700 |
| O  | 22.94320600 | 9.67987700  | 4.18259000 |
| O  | 24.34389500 | 8.91379400  | 2.19248800 |
| O  | 17.21817500 | 5.58945800  | 4.17288600 |
| O  | 24.90342700 | 6.43176500  | 3.18129400 |
| O  | 21.27481400 | 3.04329000  | 7.02894700 |
| O  | 16.36715300 | 3.69604400  | 5.50542800 |

|   |             |             |             |
|---|-------------|-------------|-------------|
| O | 18.88674200 | 4.31084700  | 5.53092300  |
| O | 17.87229500 | 3.15256600  | 3.51159800  |
| O | 20.37091900 | 2.31911200  | 3.50906300  |
| H | 20.83219400 | 6.28329400  | 7.30786900  |
| H | 18.50722300 | 8.51503200  | 8.90571200  |
| H | 22.21880500 | 9.83998800  | 3.55786700  |
| H | 19.03907300 | 6.03421400  | 6.33502200  |
| H | 16.22431200 | 2.74421300  | 5.47960600  |
| H | 17.35423700 | 8.54847400  | 3.14037300  |
| H | 17.50301100 | 9.14230800  | 4.54567400  |
| H | 20.81677900 | 2.73189100  | 2.73302700  |
| H | 19.39725500 | 2.36337700  | 3.33307100  |
| H | 21.50630700 | 3.88387900  | 7.46509200  |
| H | 20.84940200 | 2.45279000  | 7.65506300  |
| H | 26.86636500 | 5.81636700  | 6.88297200  |
| H | 27.88871600 | 6.67276100  | 6.03833500  |
| H | 24.79113900 | 7.20650700  | 2.57850200  |
| H | 24.14612900 | 5.83985700  | 3.05804900  |
| H | 15.06499400 | 4.93511900  | 5.63307000  |
| H | 14.14870500 | 5.98732900  | 6.40818600  |
| H | 22.17672200 | 8.19476800  | 5.18798500  |
| N | 21.21630300 | 4.38989100  | 1.92866200  |
| N | 20.65878200 | 6.47460300  | 2.37131800  |
| N | 20.37509200 | 10.13590700 | 0.73921700  |
| N | 19.08089300 | 9.11300000  | 2.19644400  |
| C | 21.95457700 | 6.51605900  | 1.93027700  |
| C | 22.28115800 | 5.21068800  | 1.65474200  |
| C | 20.25571900 | 5.18934600  | 2.34548500  |
| C | 20.66439500 | 10.69274700 | 1.96285600  |
| C | 19.41903000 | 9.20131000  | 0.92826300  |
| C | 19.85433400 | 10.04639900 | 2.85819300  |
| H | 20.80371400 | 10.37961000 | -0.14035400 |
| H | 21.36308500 | 11.50771300 | 2.06761400  |
| H | 19.76481800 | 10.17592900 | 3.92747600  |
| H | 19.01396800 | 8.60782500  | 0.12313600  |
| H | 22.50109200 | 7.44362700  | 1.82353700  |
| H | 20.10043500 | 7.26157700  | 2.68198900  |
| H | 19.24688200 | 4.88760800  | 2.58591100  |
| H | 23.19675200 | 4.81824300  | 1.23635100  |
| H | 25.17137000 | 11.59062000 | 4.10543400  |
